# Supplementary material for: The Influence of the Heat Transfer Mode on the Stability of Foam Extinguishing Agents
Source: MDPI journal article supplement (doi:10.3390/fire7040137), 2024-04-12
Supplement: s1 [file s1]

# The Influence of the Heat Transfer Mode on the Stability of Foam Extinguishing Agents

Xia Zhou <sup>1,2,\*</sup>, Zhihao An <sup>1</sup>, Ziheng Liu <sup>1</sup>, Hongjie Ha <sup>1</sup>, Yixuan Li <sup>1</sup> and Renming Pan <sup>1</sup>

<sup>1</sup> School of Chemistry and Chemical Engineering, Nanjing University of Science and Technology,

Nanjing 210094, China; anzhihao0107@njust.edu.cn (Z.A.);

liuziheng0821@njust.edu.cn (Z.L.); hahongjie@njust.edu.cn (H.H.);

lyx2971@njust.edu.cn (Y.L.); panrenming@njust.edu.cn (R.P.)

<sup>2</sup> School of Fashion and Textiles, The Hong Kong Polytechnic University, Kowloon 999077, Hong Kong, China

\* Correspondence: zhouxia@njust.edu.cn; Tel./Fax: +86-025-84303159

## 1. Analysis.

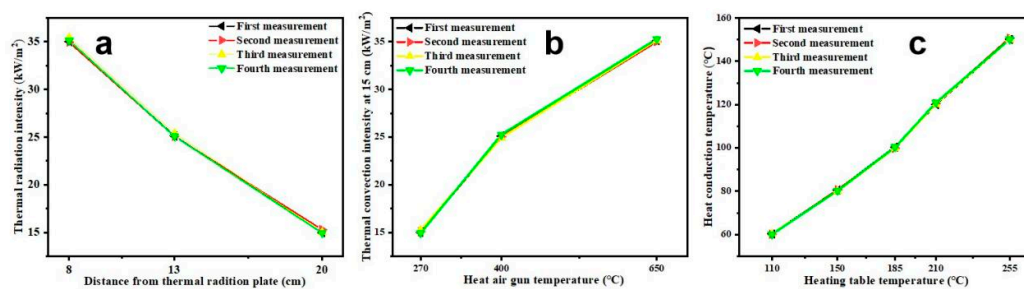

**Figure S1** calibration results of heat flux intensity and heat conduction temperature

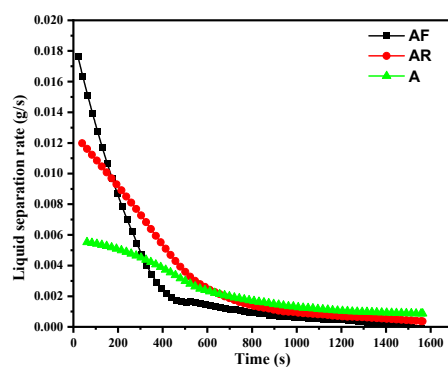

**Figure S2** liquid separation rate curves of AF, AR and A foams at room temperature

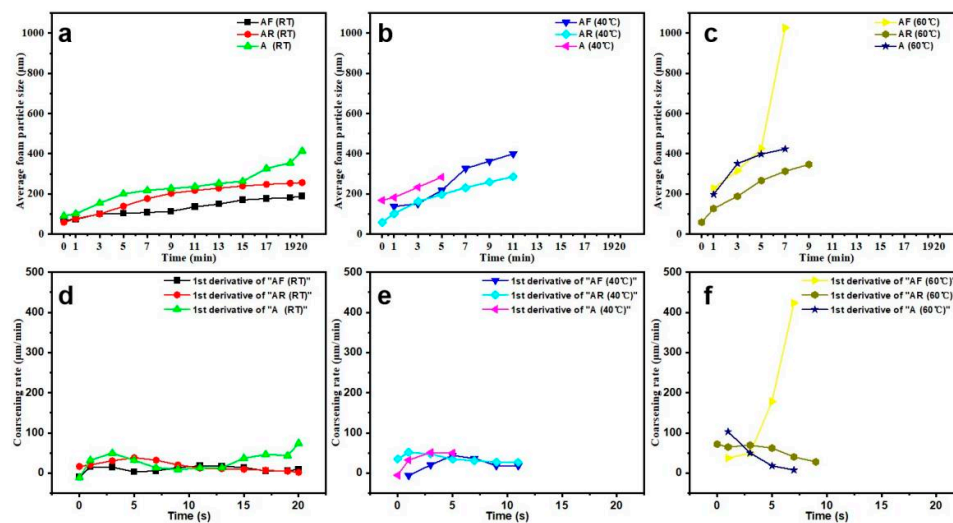

**Figure S3** average particle size of AF, AR and A foams at room temperature (RT), 40  $^{\circ}\text{C}$  and 60  $^{\circ}\text{C}$
